# Supplementary material
Source: Springer Nature journal article supplement (https://www.springermedizin.de/resource/supplementary/12936_2010_1747_MOESM7_ESM.pdf/9541602)
Supplement: MOESM7 [file 9541602]

**TropiVal,  
Uni Bordeaux ,  
France**

**Coordination**

**Pharmaceutical  
development**

**Analytical  
methods**

**Conditioning  
Stability**

**Bordeaux 2 Uni**

**Comipso**

**Creapharm  
CHU Bordeaux**

**Ellipse  
Pharmaceuticals**

**Rottendorf**
